# Supplementary material
Source: publisher site journal article supplement (https://www.spandidos-publications.com/4703/downloadSupplementary)

Figure S1. Transfection of HK-2 cells with LOXL2 shRNA results in LOXL2 knockdown. HK-2 cells were transfected with either LOXL2 shRNA lentivirus (1 and 2 MOI) to knockdown LOXL2 expression, or control shRNA virus (1 and 2 MOI). Both the (A) LOXL2 RNA and (B) protein were semi-quantified. Transfection of LOXL2 shRNA resulted in LOXL2 knockdown, whereas transfection of control shRNA did not. LOXL2, lysyl oxidase-like 2; sh-, short hairpin; MOI, multiplicity of infection; shControl, HK-2 cells transfected with control shRNA; shLOXL2, LOXL2-deficient HK-2 cells by LOXL2 shRNA transfection.

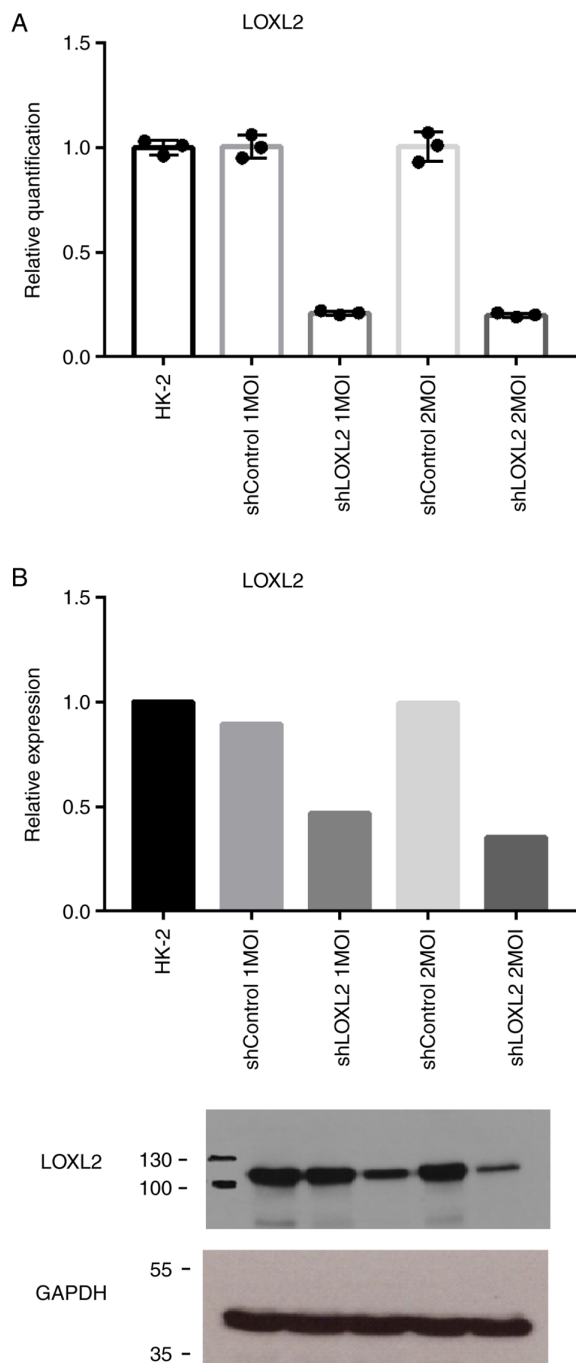

Supplement: Supplementary file 1 [file downloadSupplementary]
